# Supplementary material for: Different Redox Response Elicited by Naturally Occurring Antioxidants in Human Endothelial Cells
Source: PubMed Central journal article supplement — Open Biochem J. 2013 Apr 19;7:44–53. doi: 10.2174/1874091X01307010044 (PMC3664460; doi:10.2174/1874091x01307010044), 2013-04-19
Supplement: TOBIOCJ-7-44_SD1.pdf [file TOBIOCJ-7-44_SD1.pdf]

## Supplementary Material

## Different Redox Response Elicited by Naturally Occurring Antioxidants in Human Endothelial Cells

Roberta Giordo<sup>1</sup>, Annalisa Cossu<sup>1</sup>, Valeria Pasciu<sup>4</sup>, Phu Thi Hoa<sup>1,5</sup>, Anna Maria Posadino<sup>1</sup> and Gianfranco Pintus<sup>1,2,3,\*</sup>

<sup>1</sup>Laboratory of Vascular Biology, Department of Biomedical Sciences

<sup>2</sup>Centre of Excellence for Biotechnology Development and Biodiversity Research

<sup>3</sup>National Institute of Biostructures and Biosystems

<sup>4</sup>Department of Veterinary Medicine, University of Sassari, Sassari, Italy

<sup>5</sup>Department of Biochemistry, Huè University of Medicine and Pharmacy, Huè, Vietnam

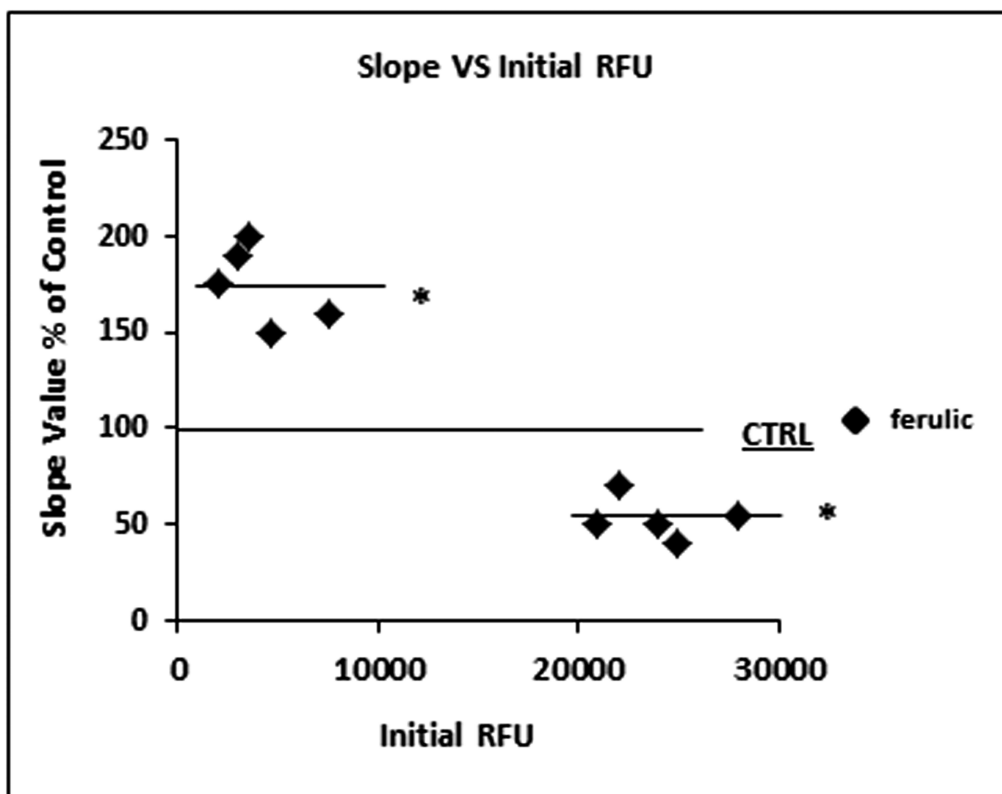

**Supplementary Fig. (1).** Effect of the intracellular redox state on ferulic acid-elicited anti- and pro-oxidant behaviour. Figure shows plot of the slope value expressed as % vs the initial measured intracellular ROS level for ferulic acid. Figure shows plot of the slope value expressed as % vs the initial measured intracellular ROS level for ferulic acid. The value of 100 in the y-axis refers to the slope value for a ROS kinetic measurements of untreated cultured human ECs (CTRL). Other data in the y-axis refer to the slope value obtained from five different ROS kinetic measurements of cultured human ECs treated for 160 minutes in the presence of 25  $\mu$ M of ferulic acid. Initial RFU value in the x-axis refers to intracellular ROS measurements performed at the beginning of each experiment. The y-axis that lie above 100 are considered as an antioxidant-induced pro-oxidant outcome, while value that lie below 100 are considered as an antioxidant-induced anti-oxidant outcome. Data in the y-axis are expressed as percentage of CTRL (untreated cells value=100). \* significantly different from CTRL at  $P < 0.05$ .
